# Supplementary material
Source: MDPI journal article supplement (https://www.mdpi.com/2409-515X/10/1/10)
Supplement: s1 [file s1]

|                                     | Question                                                                                                                              | Response                                                                                                                    | Comments |
|-------------------------------------|---------------------------------------------------------------------------------------------------------------------------------------|-----------------------------------------------------------------------------------------------------------------------------|----------|
|                                     | <b>State</b>                                                                                                                          |                                                                                                                             |          |
|                                     | What is your first tier test? (MS/MS, LC-MS/MS or fluorometry?)                                                                       |                                                                                                                             |          |
|                                     | Do you use CLIR to determine if presumptive positive or if 2nd tier test is needed?                                                   |                                                                                                                             |          |
|                                     | What is your 2nd tier test, if any?                                                                                                   |                                                                                                                             |          |
|                                     | What is your 3rd tier test, if any?                                                                                                   |                                                                                                                             |          |
|                                     | Do you report very low GALC activity irrespective of 2nd tier test?                                                                   |                                                                                                                             |          |
|                                     | Do you provide preliminary report of very low GALC activity while waiting for 2nd tier test result?                                   |                                                                                                                             |          |
|                                     | <b>Number of babies screened while PSY was used as the only 2nd tier test (no molecular testing)? (time frame: month/yr-month/yr)</b> |                                                                                                                             |          |
|                                     | <b>Number of babies that received 2nd tier PSY:</b>                                                                                   |                                                                                                                             |          |
|                                     | <b>Number of babies with PSY 2-10?</b>                                                                                                |                                                                                                                             |          |
|                                     | Number of KD confirmed but not yet treated                                                                                            |                                                                                                                             |          |
|                                     | Number of KD confirmed with HSCT planned/performed                                                                                    |                                                                                                                             |          |
|                                     | Number of considered false positive                                                                                                   |                                                                                                                             |          |
|                                     | <b>Number of babies with PSY 5-10?</b>                                                                                                |                                                                                                                             |          |
|                                     | Number of KD confirmed but not yet treated                                                                                            |                                                                                                                             |          |
|                                     | Number of KD confirmed with HSCT planned/performed                                                                                    |                                                                                                                             |          |
|                                     | Number of considered false positive                                                                                                   |                                                                                                                             |          |
|                                     | <b>Number of babies with PSY &gt;=10?</b>                                                                                             |                                                                                                                             |          |
|                                     | Number of KD confirmed but not yet treated                                                                                            |                                                                                                                             |          |
|                                     | Number of KD confirmed with HSCT planned/performed                                                                                    |                                                                                                                             |          |
|                                     | Number of considered false positive                                                                                                   |                                                                                                                             |          |
|                                     |                                                                                                                                       | <b>Number of babies screened while PSY and GALC sequencing were used as 2nd tier tests? (time frame: month/yr-month/yr)</b> |          |
|                                     | <b>Number of babies that received 2nd tier PSY and GALC seq:</b>                                                                      |                                                                                                                             |          |
|                                     | <b>Number of babies with PSY 2-10 and GALC WT/WT?</b>                                                                                 |                                                                                                                             |          |
|                                     | Number of KD confirmed but not yet treated                                                                                            |                                                                                                                             |          |
|                                     | Number of KD confirmed with HSCT planned/performed                                                                                    |                                                                                                                             |          |
|                                     | Number of considered false positive                                                                                                   |                                                                                                                             |          |
|                                     | <b>Number of babies with PSY 2-10 and GALC WT/Path</b>                                                                                |                                                                                                                             |          |
|                                     | Number of KD confirmed but not yet treated                                                                                            |                                                                                                                             |          |
|                                     | Number of KD confirmed with HSCT planned/performed                                                                                    |                                                                                                                             |          |
|                                     | Number of considered false positive                                                                                                   |                                                                                                                             |          |
|                                     | <b>Number of babies with PSY 2-10 and GALC WT/[non-path or non-WT]</b>                                                                |                                                                                                                             |          |
|                                     | Number of KD confirmed but not yet treated                                                                                            |                                                                                                                             |          |
|                                     | Number of KD confirmed with HSCT planned/performed                                                                                    |                                                                                                                             |          |
|                                     | Number of considered false positive                                                                                                   |                                                                                                                             |          |
|                                     | <b>Number of babies with PSY 2-10 and GALC Path/Path?</b>                                                                             |                                                                                                                             |          |
|                                     | Number of KD confirmed but not yet treated                                                                                            |                                                                                                                             |          |
|                                     | Number of KD confirmed with HSCT planned/performed                                                                                    |                                                                                                                             |          |
|                                     | Number of considered false positive                                                                                                   |                                                                                                                             |          |
|                                     | <b>Number of babies with PSY 2-10 and GALC Path/[non-path or non-WT]</b>                                                              |                                                                                                                             |          |
|                                     | Number of KD confirmed but not yet treated                                                                                            |                                                                                                                             |          |
|                                     | Number of KD confirmed with HSCT planned/performed                                                                                    |                                                                                                                             |          |
|                                     | Number of considered false positive                                                                                                   |                                                                                                                             |          |
|                                     | <b>Number of babies with PSY 2-10 and GALC [non-Path or non-WT]/[non-path or non-WT]</b>                                              |                                                                                                                             |          |
|                                     | Number of KD confirmed but not yet treated                                                                                            |                                                                                                                             |          |
|                                     | Number of KD confirmed with HSCT planned/performed                                                                                    |                                                                                                                             |          |
| Number of considered false positive |                                                                                                                                       |                                                                                                                             |          |

|  |                                                                                             |  |  |
|--|---------------------------------------------------------------------------------------------|--|--|
|  | <b>Number of babies with PSY 5-10 and GALT WT/WT?</b>                                       |  |  |
|  | Number of KD confirmed but not yet treated                                                  |  |  |
|  | Number of KD confirmed with HSCT planned/performed                                          |  |  |
|  | Number of considered false positive                                                         |  |  |
|  | <b>Number of babies with PSY 5-10 and GALT WT/Path</b>                                      |  |  |
|  | Number of KD confirmed but not yet treated                                                  |  |  |
|  | Number of KD confirmed with HSCT planned/performed                                          |  |  |
|  | Number of considered false positive                                                         |  |  |
|  | <b>Number of babies with PSY 5-10 and GALT WT/[non-path or non-WT]</b>                      |  |  |
|  | Number of KD confirmed but not yet treated                                                  |  |  |
|  | Number of KD confirmed with HSCT planned/performed                                          |  |  |
|  | Number of considered false positive                                                         |  |  |
|  | <b>Number of babies with PSY 5-10 and GALT Path/Path?</b>                                   |  |  |
|  | Number of KD confirmed but not yet treated                                                  |  |  |
|  | Number of KD confirmed with HSCT planned/performed                                          |  |  |
|  | Number of considered false positive                                                         |  |  |
|  | <b>Number of babies with PSY 5-10 and GALT Path/[non-path or non-WT]</b>                    |  |  |
|  | Number of KD confirmed but not yet treated                                                  |  |  |
|  | Number of KD confirmed with HSCT planned/performed                                          |  |  |
|  | Number of considered false positive                                                         |  |  |
|  | <b>Number of babies with PSY 5-10 and GALT [non-Path or non-WT]/[non-path or non-WT]</b>    |  |  |
|  | Number of KD confirmed but not yet treated                                                  |  |  |
|  | Number of KD confirmed with HSCT planned/performed                                          |  |  |
|  | Number of considered false positive                                                         |  |  |
|  | <b>Number of babies with PSY &gt;=10 and GALT WT/WT?</b>                                    |  |  |
|  | Number of KD confirmed but not yet treated                                                  |  |  |
|  | Number of KD confirmed with HSCT planned/performed                                          |  |  |
|  | Number of considered false positive                                                         |  |  |
|  | <b>Number of babies with PSY &gt;=10 and GALT WT/Path?</b>                                  |  |  |
|  | Number of KD confirmed but not yet treated                                                  |  |  |
|  | Number of KD confirmed with HSCT planned/performed                                          |  |  |
|  | Number of considered false positive                                                         |  |  |
|  | <b>Number of babies with PSY &gt;=10 and GALT WT/[non-path or non-WT]?</b>                  |  |  |
|  | Number of KD confirmed but not yet treated                                                  |  |  |
|  | Number of KD confirmed with HSCT planned/performed                                          |  |  |
|  | Number of considered false positive                                                         |  |  |
|  | <b>Number of babies with PSY &gt;=10 and GALT Path/Path?</b>                                |  |  |
|  | Number of KD confirmed but not yet treated                                                  |  |  |
|  | Number of KD confirmed with HSCT planned/performed                                          |  |  |
|  | Number of considered false positive                                                         |  |  |
|  | <b>Number of babies with PSY &gt;10 and GALT Path/[non-path or non-WT]?</b>                 |  |  |
|  | Number of KD confirmed but not yet treated                                                  |  |  |
|  | Number of KD confirmed with HSCT planned/performed                                          |  |  |
|  | Number of considered false positive                                                         |  |  |
|  | <b>Number of babies with PSY &gt;10 and GALT [non-Path or non-WT]/[non-path or non-WT]?</b> |  |  |
|  | Number of KD confirmed but not yet treated                                                  |  |  |
|  | Number of KD confirmed with HSCT planned/performed                                          |  |  |
|  | Number of considered false positive                                                         |  |  |
